# Supplementary material for: Inter-hospital transfer in patients with acute myocardial infarction in China: Findings from the improving care for cardiovascular disease in China-acute coronary syndrome project
Source: Frontiers journal article supplement (doi:10.3389/fcvm.2022.1064690), 2022-12-08
Supplement: Data_Sheet_1.PDF [file Data_Sheet_1.PDF]

## **Supplemental Material**

**Supplementary Table 1.** Definition of baseline variables

**Supplementary Table 2.** Missing rates of study variables and management of missing data (variables without any missing data are not listed in the table)

**Supplementary Table 3.** The median delay in receiving early revascularization of patients with STEMI and NSTEMI transferred from another hospital and directly admitted

**Supplementary Table 4.** Characteristics of inter-hospital transfer vs. direct admission in patients with AMI in the inverse probability of treatment-weighted sample

**Supplementary Table 5.** The median delay in receiving early revascularization patients with STEMI and NSTEMI who were transferred from another hospital and directly admitted, after excluding missing data

**Supplementary Table 6.** Early revascularization of patients with STEMI and NSTEMI who were transferred from another hospital and directly admitted, after excluding missing data

**Supplementary Table 7.** The association between in-hospital outcomes and inter-hospital transfer vs. direct admission in patients with STEMI and NSTEMI, after excluding missing data

**Supplementary Table 8.** Investigators of CCC-ACS project

**Supplementary Figure 1.** The map of regional economic level of China

**Supplementary Figure 2.** Proportion of patients with STEMI and NSTEMI in hospitals with different inter-hospital transfer rates

**Supplementary Table 1. Definition of baseline variables**

|                                                                        | Definition                                                                                                                                                                                                                                                                                                                                                                                                                                                                          |
|------------------------------------------------------------------------|-------------------------------------------------------------------------------------------------------------------------------------------------------------------------------------------------------------------------------------------------------------------------------------------------------------------------------------------------------------------------------------------------------------------------------------------------------------------------------------|
| Age                                                                    | Years after birth                                                                                                                                                                                                                                                                                                                                                                                                                                                                   |
| Female                                                                 | Female                                                                                                                                                                                                                                                                                                                                                                                                                                                                              |
| Medical insurance                                                      | Insurance with full reimbursement, basic medical insurance for urban employees, basic medical insurance for urban unemployed residents and commercial insurance were combined as medical insurance with high reimbursement. New rural cooperative medical insurance was defined as medical insurance with medium reimbursement. No medical insurance, special assistance for the poor and other types of medical insurance were defined as medical insurance with low reimbursement |
| <b>Risk factor</b>                                                     |                                                                                                                                                                                                                                                                                                                                                                                                                                                                                     |
| Hypertension                                                           | Previously diagnosed with hypertension, receiving antihypertensive therapy, or having a systolic blood pressure $\geq 140$ mm Hg or diastolic blood pressure $\geq 90$ mmHg at admission                                                                                                                                                                                                                                                                                            |
| LDL-C $\geq 70$ mg/dL                                                  | Serum LDL-C level $\geq 1.8$ mmol/L (70 mg/dL)                                                                                                                                                                                                                                                                                                                                                                                                                                      |
| Diabetes mellitus                                                      | Previous diagnosis of diabetes mellitus, receiving oral hypoglycemic drug therapy or insulin therapy, or having a hemoglobin A1c level $\geq 6.5\%$                                                                                                                                                                                                                                                                                                                                 |
| Smoking                                                                | Current smoking or smoking cessation within 1 year                                                                                                                                                                                                                                                                                                                                                                                                                                  |
| eGFR $< 60 \text{ mL} \cdot \text{min}^{-1} \cdot 1.73 \text{ m}^{-2}$ | eGFR $< 60 \text{ mL} \cdot \text{min}^{-1} \cdot 1.73 \text{ m}^{-2}$ , eGFR was calculated using the modified glomerular filtration rate estimating equation for Chinese patients with chronic kidney disease                                                                                                                                                                                                                                                                     |
| <b>Disease history</b>                                                 |                                                                                                                                                                                                                                                                                                                                                                                                                                                                                     |
| Heart failure                                                          | Previously history of heart failure                                                                                                                                                                                                                                                                                                                                                                                                                                                 |
| CHD                                                                    | Previous history of myocardial infarction or underwent percutaneous coronary intervention or coronary artery bypass grafting                                                                                                                                                                                                                                                                                                                                                        |
| Stroke/TIA                                                             | Previously history of stroke or TIA                                                                                                                                                                                                                                                                                                                                                                                                                                                 |
| <b>Severe clinical condition at admission</b>                          |                                                                                                                                                                                                                                                                                                                                                                                                                                                                                     |
| Heart failure                                                          | Heart failure at admission                                                                                                                                                                                                                                                                                                                                                                                                                                                          |

|                                                  | Definition                                                                                         |
|--------------------------------------------------|----------------------------------------------------------------------------------------------------|
| Cardiogenic shock                                | Cardiogenic shock at admission                                                                     |
| Cardiac arrest                                   | Cardiac arrest at admission                                                                        |
| <b>Arriving the first hospitals by ambulance</b> | Arriving the first hospitals by ambulance                                                          |
| <b>Medications</b>                               |                                                                                                    |
| DAPT at arrival                                  | Use of any kinds of DAPT within 24 hours of first medical contact in the PCI hospital              |
| Aspirin                                          | Use of Aspirin within 24 hours of first medical contact in the PCI hospital                        |
| P2Y12 inhibitors                                 | Use of any kinds of P2Y12 inhibitors within 24 hours of first medical contact in the PCI hospital  |
| ACEIs/ARBs at arrival                            | Use of any kinds of ACEIs/ARBs within 24 hours of first medical contact in the PCI hospital        |
| $\beta$ -Blockers at arrival                     | Use of any kinds of $\beta$ -Blockers within 24 hours of first medical contact in the PCI hospital |
| Statins at arrival                               | Use of any kinds of statins within 24 hours of first medical contact in the PCI hospital           |
| GPIIb/IIIa at arrival                            | Use of any kinds of GPIIb/IIIa within 24 hours of first medical contact in the PCI hospital        |
| Anticoagulant                                    | Non-PCI usage anticoagulant during hospitalization in the PCI hospital                             |

**Abbreviations:** ACEIs/ARBs, angiotensin-converting enzyme inhibitors/angiotensin receptor blockers; CHD, coronary heart disease; DAPT, dual antiplatelet therapy; eGFR, estimated glomerular filtration rate; LDL-C, low-density lipoprotein cholesterol; GPIIb/IIIa, glycoprotein IIb/IIIa inhibitors; and TIA, transient ischemic attacks.

**Supplementary Table 2. Missing rates of study variables and management of missing data (variables without any missing data are not listed in the table)**

|                                                         | Missing rate, % (No.) | Management of the missing data                                                                                                                                                                                                                                                                                                                                                                                            |
|---------------------------------------------------------|-----------------------|---------------------------------------------------------------------------------------------------------------------------------------------------------------------------------------------------------------------------------------------------------------------------------------------------------------------------------------------------------------------------------------------------------------------------|
| <b>Age</b>                                              | 0.16 (150/94,623)     |                                                                                                                                                                                                                                                                                                                                                                                                                           |
| <b>Sex</b>                                              | 0.00 (5/94,623)       |                                                                                                                                                                                                                                                                                                                                                                                                                           |
| <b>Systolic blood pressure</b>                          | 0.20 (190/94,623)     | Imputed using sequential regression multiple imputation method implemented by IVEware software                                                                                                                                                                                                                                                                                                                            |
| <b>Diastolic blood pressure</b>                         | 0.27 (255/94,623)     |                                                                                                                                                                                                                                                                                                                                                                                                                           |
| <b>LDL-C</b>                                            | 11.56 (10,941/94,623) |                                                                                                                                                                                                                                                                                                                                                                                                                           |
| <b>Serum creatinine</b>                                 | 4.06 (3842/94,623)    |                                                                                                                                                                                                                                                                                                                                                                                                                           |
| <b>Cardiac arrest at admission</b>                      | 0.79 (749/94,623)     |                                                                                                                                                                                                                                                                                                                                                                                                                           |
| <b>Cardiogenic Shock at admission</b>                   | 0.70 (666/94,623)     |                                                                                                                                                                                                                                                                                                                                                                                                                           |
| <b>Heart failure at admission</b>                       | 0.73 (687/94,623)     | Patients with unclear status for heart failure and cardiogenic shock were imputed by Killip class. Patients with Killip class II-III were classified as acute heart failure and patients with Killip class IV were classified as cardiogenic shock. If patients with unclear status of Killip class, we imputed the missing values using sequential regression multiple imputation method implemented by IVEware software |
| <b>Time from symptom onset to primary PCI</b>           | 17.39 (6168/35,468) * | Patients with missing value were not included for the proportion estimation                                                                                                                                                                                                                                                                                                                                               |
| <b>Time from PCI hospital arrival to primary PCI</b>    | 17.46 (6191/35,468) * | Patients with missing value were not included for the proportion estimation                                                                                                                                                                                                                                                                                                                                               |
| <b>Time from PCI hospital arrival to PCI for NSTEMI</b> | 21.67 (3805/17,554) † |                                                                                                                                                                                                                                                                                                                                                                                                                           |

**Notes:** \* The denominator was patients with STEMI who received primary PCI. † The denominator was patients with NSTEMI who received PCI.

**Abbreviations:** LDL-C, low-density lipoprotein cholesterol; NSTEMI, non-ST-segment elevation myocardial infarction; and PCI, percutaneous coronary intervention.

**Supplementary Table 3. The median delay in receiving early revascularization of patients with STEMI and NSTEMI transferred from another hospital and directly admitted**

|                                    | <b>Inter-hospital<br/>transfer</b> | <b>Direct<br/>admission</b> | <b><i>P</i> value</b> |
|------------------------------------|------------------------------------|-----------------------------|-----------------------|
| <b>STEMI</b>                       |                                    |                             |                       |
| Symptom onset to primary PCI, hour | 6.5 (4.0-11.2)                     | 4.5 (2.7-8.5)               | <0.001                |
| Door to balloon, hour              | 0.8 (0.4-1.5)                      | 1.0 (0.6-1.8)               | <0.001                |
| <b>NSTEMI</b>                      |                                    |                             |                       |
| Symptom onset to timely PCI, hour  | 16.3 (8.7-33.0)                    | 11.9 (5.7-25.5)             | <0.001                |
| Door to timely PCI, hour           | 2.8 (1.1-14.2)                     | 3.7 (1.5-10.8)              | 0.002                 |

**Abbreviations:** NSTEMI, non-ST-segment elevation myocardial infarction; PCI, percutaneous coronary intervention; and STEMI, ST-segment elevation myocardial infarction.

**Supplementary Table 4. Characteristics of inter-hospital transfer vs. direct admission in patients with AMI in the inverse probability of treatment-weighted sample**

|                                                                        | <b>Inter-hospital transfer</b><br>(N=28,329) *, † | <b>Direct admission</b><br>(N=41,352) *, † | <b>SMD</b> |
|------------------------------------------------------------------------|---------------------------------------------------|--------------------------------------------|------------|
| <b>Age, year</b>                                                       | 62.3 (12.7)                                       | 62.7 (12.8)                                | 0.002      |
| <b>Female</b>                                                          | 10026.9 (23.8)                                    | 6743.1 (23.8)                              | 0.001      |
| <b>Medical insurance</b>                                               |                                                   |                                            | 0.021      |
| High reimbursement                                                     | 24592.4 (58.4)                                    | 16269.4 (57.4)                             |            |
| Medium reimbursement                                                   | 9448.2 (22.4)                                     | 6559.1 (23.1)                              |            |
| Low reimbursement                                                      | 8072.0 (19.2)                                     | 5522.8 (19.5)                              |            |
| <b>Risk factor</b>                                                     |                                                   |                                            |            |
| Hypertension                                                           | 27294.9 (64.8)                                    | 18453.7 (65.1)                             | 0.006      |
| LDL-C $\geq 70\text{mg/dL}$                                            | 36628.0 (87.0)                                    | 24609.5 (86.8)                             | 0.005      |
| Diabetes mellitus                                                      | 11360.1 (27.0)                                    | 7654.3 (27.0)                              | 0.001      |
| Smoking                                                                | 18339.4 (43.5)                                    | 12434.1 (43.9)                             | 0.006      |
| eGFR $< 60 \text{ mL} \cdot \text{min}^{-1} \cdot 1.73 \text{ m}^{-2}$ | 7590.8 (18.0)                                     | 5164.9 (18.2)                              | 0.005      |
| <b>Disease history</b>                                                 |                                                   |                                            |            |
| CHD                                                                    | 3945.8 (9.4)                                      | 2648.4 (9.3)                               | 0.001      |
| Heart failure                                                          | 751.7 (1.8)                                       | 494.5 (1.7)                                | 0.003      |
| Stroke/TIA                                                             | 3569.7 (8.5)                                      | 2387.5 (8.4)                               | 0.002      |
| <b>Severe clinical condition at admission</b>                          |                                                   |                                            |            |
| Heart failure                                                          | 2792.1 (6.6)                                      | 1876.6 (6.6)                               | <0.001     |
| Cardiogenic shock                                                      | 1421.0 (3.4)                                      | 914.9 (3.2)                                | 0.008      |
| Cardiac arrest                                                         | 733.6 (1.7)                                       | 503.4 (1.8)                                | 0.003      |
| <b>Arriving the first hospitals by ambulance</b>                       | 3714.6 (8.8)                                      | 2398.8 (8.5)                               | 0.013      |
| <b>Medications</b>                                                     |                                                   |                                            |            |
| DAPT at arrival                                                        | 39503.0 (93.8)                                    | 26769.8 (94.4)                             | 0.026      |
| Aspirin                                                                | 40153.2 (95.3)                                    | 27198.3 (95.9)                             | 0.029      |
| P2Y12 inhibitors                                                       | 40374.5 (95.9)                                    | 27230.9 (96.0)                             | 0.009      |
| ACEIs/ARBs at arrival                                                  | 19554.1 (46.4)                                    | 13311.4 (47.0)                             | 0.010      |
| $\beta$ -Blockers at arrival                                           | 22814.4 (54.2)                                    | 26724.4 (54.6)                             | 0.008      |

|                       | <b>Inter-hospital transfer</b> | <b>Direct admission</b> | <b>SMD</b> |
|-----------------------|--------------------------------|-------------------------|------------|
|                       | <b>(N=28,329) *, †</b>         | <b>(N=41,352) *, †</b>  |            |
| Statins at arrival    | 39437.0 (93.6)                 | 26724.4 (94.3)          | 0.026      |
| GPIIb/IIIa at arrival | 13967.5 (33.2)                 | 9360.1 (33.0)           | 0.003      |
| Anticoagulant         | 32395.9 (76.9)                 | 21937.4 (77.4)          | 0.011      |

**Notes:** \* Proportion, mean and medians are weighted using inverse probability of treatment weighting (IPTW).

† The IPTW sample only includes those with complete data of all covariates included in the propensity analysis.

**Abbreviations:** ACEIs/ARBs, angiotensin-converting enzyme inhibitors/angiotensin receptor blockers; AMI, acute myocardial infarction; CHD, coronary heart disease; DAPT, dual antiplatelet therapy; eGFR, estimated glomerular filtration rate; LDL-C, low-density lipoprotein cholesterol; GPIIb/IIIa, glycoprotein IIb/IIIa inhibitors; and TIA, transient ischemic attacks.

**Supplementary Table 5. The median delay in receiving early revascularization patients with STEMI and NSTEMI who were transferred from another hospital and directly admitted, after excluding missing data**

|                                    | Inter-hospital<br>transfer | Direct<br>admission | <i>P</i> value |
|------------------------------------|----------------------------|---------------------|----------------|
| <b>STEMI</b>                       |                            |                     |                |
| Symptom onset to primary PCI, hour | 7.2 (4.8-11.7)             | 5.4 (3.5-9.3)       | <0.001         |
| Door to balloon, hour              | 1.3 (0.7-2.1)              | 1.5 (0.9-2.3)       | <0.001         |
| <b>NSTEMI</b>                      |                            |                     |                |
| Symptom onset to timely PCI, hour  | 16.7 (8.7-34.0)            | 13.0 (6.4-26.5)     | <0.001         |
| Door to timely PCI, hour           | 2.8 (1.2-14.4)             | 3.5 (1.5-10.7)      | 0.166          |

**Abbreviations:** NSTEMI, non-ST-segment elevation myocardial infarction; PCI, percutaneous coronary intervention; and STEMI, ST-segment elevation myocardial infarction.



**Supplementary Table 6. Early revascularization of patients with STEMI and NSTEMI who were transferred from another hospital and directly admitted, after excluding missing data**

|                   | <b>Inter-hospital<br/>transfer</b> | <b>Direct<br/>admission</b> | <b><i>P</i> value</b> |
|-------------------|------------------------------------|-----------------------------|-----------------------|
| <b>STEMI</b>      |                                    |                             |                       |
| Reperfusion       | 8298 (50.9)                        | 8780 (60.6)                 | <0.001                |
| Fibrinolysis      | 1974 (12.1)                        | 731(5.0)                    | <0.001                |
| Primary PCI       | 6324 (38.8)                        | 8049 (55.5)                 | <0.001                |
| DTB within 90min* | 4467 (70.5)                        | 5248 (65.2)                 | <0.001                |
| <b>NSTEMI</b>     |                                    |                             |                       |
| Timely PCI†       | 761 (28.4)                         | 1217 (36.2)                 | <0.001                |

**Notes:** \* The denominator was STEMI patients who received primary PCI. † The denominator was NSTEMI patients who received PCI.

**Abbreviations:** DTB, door-to-balloon, NSTEMI, non-ST-segment elevation myocardial infarction; PCI, percutaneous coronary intervention; and STEMI, ST-segment elevation myocardial infarction.

**Supplementary Table 7. The association between in-hospital outcomes and inter-hospital transfer vs. direct admission in patients with STEMI and NSTEMI, after excluding missing data**

|               | Inter-hospital<br>transfer | Direct<br>admission | HR (95%CI) *     | P value |
|---------------|----------------------------|---------------------|------------------|---------|
| <b>STEMI</b>  |                            |                     |                  |         |
| MACE          | 2.2 (268/12,450)           | 2.9 (377/13,223)    | 0.96 (0.80-1.15) | 0.674   |
| Death         | 1.4 (174/12,450)           | 1.8 (234/13,223)    | 1.07 (0.87-1.33) | 0.522   |
| <b>NSTEMI</b> |                            |                     |                  |         |
| MACE          | 1.6 (49/2985)              | 2.8 (151/5463)      | 0.98 (0.67-1.43) | 0.925   |
| Death         | 1.1 (32/2985)              | 1.7 (91/5463)       | 1.07 (0.69-1.67) | 0.755   |

**Notes:** \* Adjusted for age, sex, medical insurance, risk factors (hypertension, LDL-C  $\geq 70$  mg/dL, eGFR  $< 60$  mL·min<sup>-1</sup>·1.73 m<sup>-2</sup>, diabetes mellitus, and smoking), disease history (CHD, heart failure, and stroke/TIA), clinical condition at admission (heart failure, cardiogenic shock, cardiac arrest), time from symptom onset to PCI hospital admission, ambulance, DAPT, GPIIb/IIIa, ACEI/ARBs,  $\beta$ -blockers and statins at arrival, anticoagulant, year of admission, characteristics of hospital (hospital level, economic level), geographical area, fibrinolysis (only for STEMI) and PCI (primary PCI, non-primary PCI and no PCI for STEMI; timely PCI, non-timely PCI and no PCI for NSTEMI).

**Abbreviations:** CI, confidence interval; HR, hazard ratio; MACE, major adverse cardiovascular events; NSTEMI, non-ST-segment elevation myocardial infarction; and STEMI, ST-segment elevation myocardial infarction.

**Supplementary Table 8. Investigators of CCC-ACS project**

| <b>ID</b> | <b>Hospitals</b>                                              | <b>Territories</b> | <b>Provinces</b> | <b>City</b> | <b>Investigator</b>       |
|-----------|---------------------------------------------------------------|--------------------|------------------|-------------|---------------------------|
| 1         | Peking University First Hospital                              | Northern China     | Beijing          | Beijing     | Jie Jiang                 |
| 2         | Beijing Anzhen Hospital, Capital Medical University           | Northern China     | Beijing          | Beijing     | Shaoping Nie, Xiaohui Liu |
| 3         | The First Affiliated Hospital of Bengbu Medical College       | Eastern China      | Anhui            | Bengbu      | Honhju Wang               |
| 4         | Beijing Friendship Hospital, Capital Medical University       | Northern China     | Beijing          | Beijing     | Hongwei Li                |
| 5         | The First Affiliated Hospital of Chongqing Medical University | Southwest China    | Chongqing        | Chongqing   | Suxin Luo                 |
| 6         | Changhai Hospital of Shanghai                                 | Eastern China      | Shanghai         | Shanghai    | Xianxian Zhao             |
| 7         | Xinqiao Hospital, Third Military Medical University           | Southwest China    | Chongqing        | Chongqing   | Cui Bin, Lan Huang        |
| 8         | Dongguan People's Hospital                                    | Southern China     | Guangdong        | Dongguan    | Jianfeng Ye               |
| 9         | Zhongda Hospital, Southeast University                        | Eastern China      | Jiangsu          | Nanjing     | Genshan Ma                |
| 10        | Gansu Provincial Hospital                                     | Northwest China    | Gansu            | Lanzhou     | Ping Xie                  |
| 11        | Guangdong General Hospital                                    | Southern China     | Guangdong        | Guangzhou   | Jiyan Chen                |
| 12        | The First Affiliated Hospital of Guangxi Medical University   | Southern China     | Guangxi          | Nanning     | Lang Li                   |
| 13        | The People's Hospital of Guangxi Zhuang Autonomous Region     | Southern China     | Guangxi          | Nanning     | Yingzhong Lin             |
| 14        | Panyu Hospital of Chinese Medicine                            | Southern China     | Guangdong        | Guangzhou   | Jianhao Li                |
| 15        | The Affiliated Hospital of Guizhou Medical University         | Southwest China    | Guizhou          | Guiyang     | Lirong Wu                 |
| 16        | The 2nd Affiliated Hosiptal of Harbin Medical University      | Northeast China    | Heilongjiang     | Harbin      | Bo Yu                     |
| 17        | Navy General Hospital                                         | Northern China     | Beijing          | Beijing     | Tianchang Li              |
| 18        | Haikou People's Hospital                                      | Southern China     | Hainan           | Haikou      | Moshui Chen               |
| 19        | Hainan General Hospital                                       | Southern China     | Hainan           | Haikou      | Bin Li                    |
| 20        | The First Hospital of Handan                                  | Northern China     | Hebei            | Handan      | Shuanli Xin               |

| ID | Hospitals                                                                                 | Territories     | Provinces | City         | Investigator          |
|----|-------------------------------------------------------------------------------------------|-----------------|-----------|--------------|-----------------------|
| 21 | Hebei General Hospital                                                                    | Northern China  | Hebei     | Shijiazhuang | Xiaoyong Qi           |
| 22 | The Second Hospital of Hebei Medical University                                           | Northern China  | Hebei     | Shijiazhuang | Xianghua Fu           |
| 23 | The First Affiliated Hospital of Henan University of Science and Technology               | Central China   | Henan     | Luoyang      | Pingshuan Dong        |
| 24 | Henan Provincial People's Hospital                                                        | Central China   | Henan     | Zhengzhou    | Chuanyu Gao           |
| 25 | Chenzhou First People's Hospital                                                          | Central China   | Hunan     | Chenzhou     | Qiaoqing Zhong        |
| 26 | Hunan Provincial People's Hospital                                                        | Central China   | Hunan     | Changsha     | Ying Guo              |
| 27 | West China Hospital of Sichuan University                                                 | Northwest China | Sichuan   | Chengdu      | Xiaoping Chen         |
| 28 | Huai'an First People's Hospital                                                           | Eastern China   | Jiangsu   | Huai'an      | Shuren Ma             |
| 29 | The First Hospital of Jilin University                                                    | Northeast China | Jilin     | Changchun    | Yang Zheng            |
| 30 | The Second Hospital of Jilin University                                                   | Northeast China | Jilin     | Changchun    | Bin Liu               |
| 31 | Nanjing Drum Tower Hospital, The Affiliated Hospital of Nanjing University Medical School | Eastern China   | Jiangsu   | Nanjing      | Biao Xu, Guangshu Han |
| 32 | Jiangsu Province Hospital                                                                 | Eastern China   | Jiangsu   | Nanjing      | Zhijian Yang          |
| 33 | The 309th Hospital of Chinese People's Liberation Army                                    | Northern China  | Beijing   | Beijing      | Fakuan Tang, Jun Xiao |
| 34 | First Affiliated Hospital of the People's Liberation Army General Hospital                | Northern China  | Beijing   | Beijing      | Miao Tian             |
| 35 | The First Affiliated Hospital of Lanzhou University                                       | Northwest China | Gansu     | Lanzhou      | Zheng Zhang           |
| 36 | The First Affiliated Hospital of Liaoning Medical University                              | Northeast China | Liaoning  | Jinzhou      | Guizhou Tao           |
| 37 | China Meitan General Hospital                                                             | Northern China  | Beijing   | Beijing      | Di Wu                 |
| 38 | The First Affiliated Hospital to Nanchang University                                      | Eastern China   | Jiangxi   | Nanchang     | Zeqi Zheng            |
| 39 | The Second Affiliated Hospital to Nanchang University                                     | Eastern China   | Jiangxi   | Nanchang     | Xiaoshu Cheng         |
| 40 | Nanfang Hospital of Southern Medical University                                           | Southern China  | Guangdong | Guangzhou    | Yuqing Hou            |

| ID | Hospitals                                                                        | Territories     | Provinces      | City         | Investigator   |
|----|----------------------------------------------------------------------------------|-----------------|----------------|--------------|----------------|
| 41 | Inner Mongolia People's Hospital                                                 | Northern China  | Inner Mongolia | Hohhot       | Xingsheng Zhao |
| 42 | Affiliated Hospital of Ningxia Medical University                                | Northwest China | Ningxia        | Yinchuan     | Shaobin Jia    |
| 43 | People's Hospital of Qinghai Province                                            | Northwest China | Qinghai        | Xining       | Rong Chang     |
| 44 | Binzhou City Center Hospital                                                     | Eastern China   | Shandong       | Binzhou      | Lijun Meng     |
| 45 | Shanxi Provincial People's Hospital                                              | Northern China  | Shanxi         | Taiyuan      | Chunlin Lai    |
| 46 | Shanxi Cardiovascular Hospital                                                   | Northern China  | Shanxi         | Taiyuan      | Bao Li         |
| 47 | The Second Hospital of Shanxi Medical University                                 | Northern China  | Shanxi         | Taiyuan      | Zhiming Yang   |
| 48 | The Ninth Hospital Affiliated to Shanghai Jiaotong University School of Medicine | Eastern China   | Shanghai       | Shanghai     | Changqian Wang |
| 49 | Shanghai Sixth People's Hospital                                                 | Eastern China   | Shanghai       | Shanghai     | Shixin Ma      |
| 50 | Tongren Hospital Affiliated to Shanghai Jiaotong University School of Medicine   | Eastern China   | Shanghai       | Shanghai     | Li Jiang       |
| 51 | The General Hospital of Shenyang Military Region                                 | Northeast China | Liaoning       | Shenyang     | Yaling Han     |
| 52 | The Third Hospital of Shijiazhuang                                               | Northern China  | Hebei          | Shijiazhuang | Zhenguo Ji     |
| 53 | North Jiangsu People's Hospital                                                  | Eastern China   | Jiangsu        | Yangzhou     | Shenghu He     |
| 54 | General Hospital of TISCO                                                        | Northern China  | Shanxi         | Taiyuan      | Huifeng Wang   |
| 55 | Tianjin Chest Hospital                                                           | Northern China  | Tianjin        | Tianjin      | Yin Liu        |
| 56 | Teda International Cardiovascular Hospital                                       | Northern China  | Tianjin        | Tianjin      | Wenhua Lin     |
| 57 | Tianjin Medical University General Hospital                                      | Northern China  | Tianjin        | Tianjin      | Yuemin Sun     |
| 58 | Wuxi People's Hospital                                                           | Eastern China   | Jiangsu        | Wuxi         | Zhenyu Yang    |
| 59 | The First Affiliated Hospital of Xi'an Jiaotong University                       | Northwest China | Shaanxi        | Xi'an        | Zuyi Yuan      |
| 60 | Xijing Hospital                                                                  | Northwest China | Shaanxi        | Xi'an        | Ling Tao       |

| ID | Hospitals                                                           | Territories     | Provinces      | City      | Investigator   |
|----|---------------------------------------------------------------------|-----------------|----------------|-----------|----------------|
| 61 | Southwest Hospital, Third Military Medical University               | Southwest China | Chongqing      | Chongqing | Zhiyuan Song   |
| 62 | Hospital of Xinjiang Production & Construction Corps                | Northwest China | Xinjiang       | Urumchi   | Junming Liu    |
| 63 | The First Teaching Hospital of Xinjiang Medical University          | Northwest China | Xinjiang       | Urumchi   | Yitong Ma      |
| 64 | Xinjiang Uygur Autonomous Region People's Hospital                  | Northwest China | Xinjiang       | Urumchi   | Guoqing Li     |
| 65 | The Affiliated Hospital of Xuzhou Medical College                   | Eastern China   | Jiangsu        | Xuzhou    | Zhirong Wang   |
| 66 | People's Hospital of Yuxi City                                      | Southwest China | Yunnan         | Yuxi      | Yinglu Hao     |
| 67 | The Second People's Hospital of Yunnan Province                     | Southwest China | Yunnan         | Kunming   | Minghua Han    |
| 68 | Sir Run Run Shaw Hospital, College of Medicine, Zhejiang University | Eastern China   | Zhejiang       | Hangzhou  | Guosheng Fu    |
| 69 | The Second Affiliated Hospital of Zhengzhou University              | Central China   | Henan          | Zhengzhou | Yulan Zhao     |
| 70 | The First Affiliated Hospital of Zhengzhou University               | Central China   | Henan          | Zhengzhou | Ling Li        |
| 71 | The Third Xiangya Hospital of Central South University              | Central China   | Hunan          | Changsha  | Weihong Jiang  |
| 72 | Sun Yat-sen Memorial Hospital, Sun Yat-sen University               | Southern China  | Guangdong      | Guangzhou | Jingfeng Wang  |
| 73 | The Military General Hospital of Beijing PLA                        | Northern China  | Beijing        | Beijing   | Junxia Li      |
| 74 | Baogang Hospital                                                    | Northern China  | Inner Mongolia | Baotou    | Yongdong Li    |
| 75 | Zhejiang Provincial Hospital of TCM                                 | Eastern China   | Zhejiang       | Hangzhou  | Wei Mao        |
| 76 | Affiliated Hospital of Qinghai University                           | Northwest China | Qinghai        | Xining    | Weijun Liu     |
| 77 | Anhui Provincial Hospital                                           | Eastern China   | Anhui          | Hefei     | Likun Ma       |
| 78 | Anyang District Hospital                                            | Central China   | Henan          | Anyang    | Hui Liu        |
| 79 | The Third the People's Hospital of Bengbu                           | Eastern China   | Anhui          | Bengbu    | Gengsheng Sang |
| 80 | Cangzhou Central Hospital                                           | Northern China  | Hebei          | Cangzhou  | Zesheng Xu     |

| ID  | Hospitals                                                                            | Territories     | Provinces | City      | Investigator  |
|-----|--------------------------------------------------------------------------------------|-----------------|-----------|-----------|---------------|
| 81  | The First People's Hospital of Changde                                               | Central China   | Hunan     | Changde   | Yi Huang      |
| 82  | Dalian Municipal Central Hospital                                                    | Northeast China | Liaoning  | Dalian    | Hailong Lin   |
| 83  | The Second hospital of Dalian Medical University                                     | Northeast China | Liaoning  | Dalian    | Peng Qu       |
| 84  | The First Affiliated hospital of Dalian Medical University                           | Northeast China | Liaoning  | Dalian    | Yanzong Yang  |
| 85  | Fujian Provincial Hospital                                                           | Eastern China   | Fujian    | Fuzhou    | Yansong Guo   |
| 86  | Longyan First Hospital                                                               | Eastern China   | Fujian    | Longyan   | Kaihong Chen  |
| 87  | The First Affiliated Hospital of Fujian Medical University                           | Eastern China   | Fujian    | Fuzhou    | Jinzi Su      |
| 88  | Affiliated Hospital of Guangdong Medical College                                     | Southern China  | Guangdong | Guangzhou | Keng Wu       |
| 89  | Guangzhou Red Cross Hospital                                                         | Southern China  | Guangdong | Guangzhou | Tongguo Wu    |
| 90  | The First Affiliated Hospital of Guangzhou Medical College                           | Southern China  | Guangdong | Guangzhou | Wei Wang      |
| 91  | The Third Affiliated Hospital of Guangzhou Medical College                           | Southern China  | Guangdong | Guangzhou | Ximing Chen   |
| 92  | Guizhou Provincial People's Hospital                                                 | Northwest China | Guizhou   | Guiyang   | Qiang Wu      |
| 93  | The Central Hospital of Zhoukou                                                      | Central China   | Henan     | Zhoukou   | Hualing Liu   |
| 94  | The Central Hospital of Jilin                                                        | Northeast China | Jilin     | Changchun | Shuangbin Li  |
| 95  | The First People's Hospital of Jining                                                | Eastern China   | Shandong  | Jining    | Xiaofei Sun   |
| 96  | Affiliated Hospital of Jiangsu University                                            | Eastern China   | Jiangsu   | Zhenjiang | Jinchuan Yan  |
| 97  | Jiangxi Provincial People's Hospital                                                 | Eastern China   | Jiangxi   | Nanchang  | Lang Ji       |
| 98  | The People's Hospital of Liaoning Province                                           | Northeast China | Liaoning  | Shenyang  | Zhanquan Li   |
| 99  | The First Affiliated Hospital of Liaoning University of Traditional Chinese Medicine | Northeast China | Liaoning  | Shenyang  | Ping Hou      |
| 100 | Liaocheng People's Hospital                                                          | Eastern China   | Shandong  | Liaocheng | Chunyan Zhang |

| ID  | Hospitals                                                   | Territories     | Provinces    | City       | Investigator            |
|-----|-------------------------------------------------------------|-----------------|--------------|------------|-------------------------|
| 101 | Linyi People's Hospital                                     | Eastern China   | Shandong     | Linyi      | Zhihong Ou              |
| 102 | Mudanjiang Cardiovascular Disease Hospital                  | Northeast China | Heilongjiang | Mudanjiang | Jianwen Liu             |
| 103 | The First People's Hospital of Nanning City                 | Southern China  | Guangxi      | Nanning    | Jinru Wei               |
| 104 | Ningxia People's Hospital                                   | Northwest China | Ningxia      | Yinchuan   | Hong Luan               |
| 105 | Qingdao Municipal Hospital                                  | Eastern China   | Shandong     | Qingdao    | Jun Guan                |
| 106 | Quanzhou First Hospital                                     | Eastern China   | Fujian       | Quanzhou   | Rong Lin                |
| 107 | The First Affiliated Hospital of Xiamen University          | Eastern China   | Fujian       | Xiamen     | Qiang Xie               |
| 108 | Xiamen Cardiovascular Disease Hospital                      | Eastern China   | Fujian       | Xiamen     | Yan Wang                |
| 109 | Qilu Hospital of Shandong University                        | Eastern China   | Shandong     | Jinan      | Jifu Li                 |
| 110 | Yantaishan hospital                                         | Eastern China   | Shandong     | Yantai     | Juexin Fan              |
| 111 | Zhongshan Hospital Affiliated to Fudan University           | Eastern China   | Shanghai     | Shanghai   | Junbo Ge                |
| 112 | Shanghai East Hospital Affiliated to Tongji University      | Eastern China   | Shanghai     | Shanghai   | Xuebo Liu               |
| 113 | The Central Hospital of Shaoyang                            | Central China   | Hunan        | Shaoyang   | Zewei Ouyang            |
| 114 | Central Hospital Affiliated to Shenyang Medical College     | Northeast China | Liaoning     | Shenyang   | Man Zhang, Kaiming Chen |
| 115 | The First Affiliated Hospital of Soochow University         | Eastern China   | Jiangsu      | Suzhou     | Xiangjun Yang           |
| 116 | The Second Affiliated Hospital of Soochow University        | Eastern China   | Jiangsu      | Suzhou     | Weiting Xu              |
| 117 | The Central Hospital of Taiyuan                             | Northern China  | Shanxi       | Taiyuan    | Xiaoping Chen           |
| 118 | Tangshan Gongren Hospital                                   | Northern China  | Hebei        | Tangshan   | Zheng Ji                |
| 119 | The First Affiliated Hospital of Wannan Medical College     | Eastern China   | Anhui        | Wuhu       | Xingsheng Tang          |
| 120 | The First Affiliated Hospital of Wenzhou Medical University | Eastern China   | Zhejiang     | Wenzhou    | Weijian Huang           |
| 121 | Wuzhou People's Hospital                                    | Southern China  | Guangxi      | Wuzhou     | Shaowu Ye               |



| ID  | Hospitals                                                        | Territories     | Provinces    | City      | Investigator  |
|-----|------------------------------------------------------------------|-----------------|--------------|-----------|---------------|
| 122 | Renmin Hospital of Wuhan University                              | Central China   | Hubei        | Wuhan     | Hong Jiang    |
| 123 | Xiangtan City Central Hospital                                   | Central China   | Hunan        | Xiangtan  | Lilong Tang   |
| 124 | The Central Hospital of Xuzhou                                   | Eastern China   | Jiangsu      | Xuzhou    | Peiying Zhang |
| 125 | Affiliated Hospital of Yan'an University                         | Northwest China | Shaanxi      | Yan'an    | Xiaochuan Ma  |
| 126 | Yancheng Third People's Hospital                                 | Eastern China   | Jiangsu      | Yancheng  | Chunyang Wu   |
| 127 | Yangzhou First People's Hospital                                 | Eastern China   | Jiangsu      | Yangzhou  | Aihua Li      |
| 128 | Yichang Central Hospital                                         | Central China   | Hubei        | Yichang   | Jiawang Ding  |
| 129 | The First People's Hospital of Yunnan Province (Kunhua Hospital) | Northwest China | Yunnan       | Kunming   | Hong Zhang    |
| 130 | Hospital 463 of Chinese People's Liberation Army                 | Northeast China | Liaoning     | Shenyang  | Bosong Yang   |
| 131 | The First Affiliated Hospital of China Medical University        | Northeast China | Liaoning     | Shenyang  | Yingxian Sun  |
| 132 | The Fourth Affiliated Hospital of China Medical University       | Northeast China | Liaoning     | Shenyang  | Yuanzhe Jin   |
| 133 | The Second Xiangya Hospital of Central South University          | Central China   | Hunan        | Changsha  | Daoquan Peng  |
| 134 | Xiangya Hospital Central South University                        | Central China   | Hunan        | Changsha  | Tianlun Yang  |
| 135 | Zhoushan People's Hospital                                       | Eastern China   | Zhejiang     | Zhoushan  | Guoxiong Chen |
| 136 | Chengdu Third People's Hospital                                  | Northwest China | Sichuan      | Chengdu   | Jiong Tang    |
| 137 | Tangdu Hospital of The Fourth Military Medical University        | Northwest China | Shaanxi      | Xi'an     | Xue Li        |
| 138 | The First Hospital of Haerbin City                               | Northeast China | Heilongjiang | Harbin    | Lin Wei       |
| 139 | The First Affiliated Hospital of Jiamusi University              | Northeast China | Heilongjiang | Jiamusi   | Zhaofa He     |
| 140 | The Central Hospital of Panzhihua                                | Northwest China | Sichuan      | Panzhihua | Dawen Xu      |
| 141 | The First Hospital of Qiqihaer City                              | Northeast China | Heilongjiang | Qiqihaer  | Gang Xu       |

| ID  | Hospitals                                          | Territories     | Provinces    | City      | Investigator  |
|-----|----------------------------------------------------|-----------------|--------------|-----------|---------------|
| 142 | Wuhan Asia Heart Hospital                          | Central China   | Hubei        | Wuhan     | Xi Su         |
| 143 | Sichuan Provincial People's Hospital               | Northwest China | Sichuan      | Chengdu   | Jianhong Tao  |
| 144 | The Central Hospital of Mianyang                   | Northwest China | Sichuan      | Mianyang  | Caidong Luo   |
| 145 | The First Hospital of Jiamusi                      | Northeast China | Heilongjiang | Jiamusi   | Guixia Zhang  |
| 146 | Huaibei Miners General Hospital                    | Eastern China   | Anhui        | Huaibei   | Zhenqi Su     |
| 147 | Beijing Tsinghua Changgung Hospital                | Northern China  | Beijing      | Beijing   | Ping Zhang    |
| 148 | Chongqing Hechuan District People's Hospital       | Southwest China | Chongqing    | Chongqing | Xin Tang      |
| 149 | Yuzhou City Central Hospital                       | Central China   | Henan        | Xuchang   | Qinfeng Su    |
| 150 | Jianshui County People's Hospital                  | Southwest China | Yunnan       | Honghe    | Weiying Fan   |
| 151 | Dunhua City Hospital                               | Northeast China | Jilin        | Yanbian   | Fanju Meng    |
| 152 | Shenyang City Electricity Central Hospital         | Northeast China | Liaoning     | Shenyang  | Jing Xu       |
| 153 | Shanghai Jingan District Shibe Hospital            | Eastern China   | Shanghai     | Shanghai  | Bin Wang      |
| 154 | Beijing Fangshan District First Hospital           | Northern China  | Beijing      | Beijing   | Xuemei Peng   |
| 155 | Hebei Daming County People's Hospital              | Northern China  | Hebei        | Handan    | Haiping Guo   |
| 156 | Jiangsu Binhai County People's Hospital            | Eastern China   | jiangsu      | Yancheng  | Yonglin Zhang |
| 157 | The First People's Hospital of Longquanyi District | Southwest China | Sichuan      | Chengdu   | Wei Tuo       |
| 158 | Guangxi Hengxian County People's Hospital          | Southern China  | Guangxi      | Nanning   | Xianan Zhang  |
| 159 | Hunan Changsha County First People's Hospital      | Central China   | Hunan        | Changsha  | Siding Wang   |
| 160 | People's Hospital of Wugang                        | Central China   | Hunan        | Shaoyang  | JiaoMei Yang  |
| 161 | Longhui County People's Hospital                   | Central China   | Hunan        | Shaoyang  | XiaoJun Wang  |
| 162 | Heilongjiang Fujin City Central Hospital           | Northeast China | Heilongjiang | Jiamusi   | Jiyan Yin     |

| ID  | Hospitals                                                     | Territories     | Provinces      | City       | Investigator  |
|-----|---------------------------------------------------------------|-----------------|----------------|------------|---------------|
| 163 | Dalian Fourth People's Hospital                               | Northeast China | Liaoning       | Dalian     | Huifang Zhang |
| 164 | General Hospital of Guangzhou Military Command                | Southern China  | Guangdong      | Guangzhou  | Yanlie Zheng  |
| 165 | The First People's Hospital of Horqin District, Tongliao City | Northern China  | Inner Mongolia | Tongliao   | Junping Fang  |
| 166 | Guiyang Sixth People's Hospital                               | Southwest China | Guizhou        | Guiyang    | Kalan Luo     |
| 167 | Geological Mining Hospital of Hunan Province                  | Central China   | Hunan          | Changsha   | Naiyi Liang   |
| 168 | Zhangzhou Municipal Hospital of Fujian Province               | Eastern China   | Fujian         | Zhangzhou  | Changyong Liu |
| 169 | Jining City Yanzhou District People's Hospital                | Eastern China   | Shandong       | Jining     | Jian Yang     |
| 170 | The People's Hospital Feixian                                 | Eastern China   | Shandong       | Linyi      | Honghua Deng  |
| 171 | Tangshan City Fengrun District People's Hospital              | Northern China  | Hebei          | Tangshan   | Lin Wang      |
| 172 | Qian'an People's Hospital                                     | Northern China  | Hebei          | Tangshan   | Yuheng Yang   |
| 173 | Yuzhong County People's Hospital                              | Northwest China | Gansu          | Lanzhou    | Xiaowei Peng  |
| 174 | Baiyin Cite Center Hospital                                   | Northwest China | Gansu          | Baiyin     | Fang Zhao     |
| 175 | Mingguang People's Hospital                                   | Eastern China   | Anhui          | Chuzhou    | Yong Li       |
| 176 | Xihua County People's Hospital                                | Central China   | Henan          | Zhoukou    | Chuntong Wang |
| 177 | Zhalantun People's Hospital                                   | Northern China  | Inner Mongolia | Hulunbeier | Yuhua Zhu     |
| 178 | Fengrun District Second People's Hospital                     | Northern China  | Hebei          | Tangshan   | Jingshan Zhao |
| 179 | Zhangping City Hospital                                       | Eastern China   | Fujian         | Longyan    | Jinxing Yi    |
| 180 | The Eight Affiliated Hospital, Sun Yat-sen University         | Southern China  | Guangdong      | Guangzhou  | Nan Jia       |
| 181 | The Second Affiliated Hospital of Qiqihar Medical Hospital    | Northeast China | Heilongjiang   | Qiqihar    | Yanli Wang    |
| 182 | Fuqing Cite Hospital                                          | Eastern China   | Fujian         | Fuqing     | Ping Chen     |
| 183 | Wuhan University of Science and Technology Hospital           | Central China   | Hubei          | Wuhan      | Jing Hu       |

| ID  | Hospitals                                          | Territories     | Provinces      | City         | Investigator     |
|-----|----------------------------------------------------|-----------------|----------------|--------------|------------------|
| 184 | Baotou City Center Hospital                        | Northern China  | Inner Mongolia | Baotou       | Ruiping Zhao     |
| 185 | Shanghai Jiading District Center Hospital          | Eastern China   | Shanghai       | Shanghai     | Xia Chen         |
| 186 | Datong City Second People's Hospital               | Northern China  | Shanxi         | Datong       | Xiaoqin Zhang    |
| 187 | Binyang People's Hospital                          | Southern China  | Guangxi        | Nanning      | Fudong Gan       |
| 188 | Deqing People's Hospital                           | Eastern China   | Zhejiang       | Huzhou       | Fangfang Huang   |
| 189 | Xinmi people's hospital                            | Central China   | Henan          | Zhengzhou    | Xiaolei Li       |
| 190 | Dongguan Changping hospital                        | Southern China  | Guangdong      | Dongguan     | Haiyun Lin       |
| 191 | Gongyi people's hospital                           | Central China   | Henan          | Zhengzhou    | Tianmin Du       |
| 192 | Ye County people's hospital                        | Central China   | Henan          | Pingdingshan | Jie Yang         |
| 193 | The second people's hospital of Mengcheng          | Eastern China   | Anhui          | Bozhou       | Pengfei Zhang    |
| 194 | Nanpi People's Hospital                            | Northern China  | Hebei          | Cangzhou     | Hui Dong         |
| 195 | Shimen People's Hospital                           | Central China   | Hunan          | Changde      | Chuanliang Liang |
| 196 | Tieli People's Hospital                            | Northeast China | Heilongjiang   | Yichun       | Yanbo Niu        |
| 197 | Sihui People's Hospital                            | Southern China  | Guangdong      | Zhaoqing     | Yuehua Huang     |
| 198 | Chest Hospital of Xinjiang Uygur Autonomous Region | Northwest China | Xinjiang       | Urumchi      | Dongsheng Chai   |
| 199 | Beian First People's Hospital                      | Northeast China | Heilongjiang   | Heihe        | Dongyan Li       |
| 200 | Zunhua People's Hospital                           | Northern China  | Hebei          | Tangshan     | Xiaoli Yang      |
| 201 | Lujiang People's Hospital                          | Eastern China   | Anhui          | Hefei        | Qichun Wang      |
| 202 | Qinyang People's Hospital                          | Central China   | Henan          | Jiaozuo      | Xiaowen Ma       |
| 203 | Longmen People's Hospital                          | Southern China  | Guangdong      | Huizhou      | Yingchao Luo     |
| 204 | Quyang Renji Hospital                              | Northern China  | Hebei          | Baoding      | Congliang Zhang  |

| ID  | Hospitals                                                         | Territories     | Provinces    | City      | Investigator   |
|-----|-------------------------------------------------------------------|-----------------|--------------|-----------|----------------|
| 205 | Nenjiang People's Hospital                                        | Northeast China | Heilongjiang | Heihe     | Shuhua Zhang   |
| 206 | Longjiang First People's Hospital                                 | Northeast China | Heilongjiang | Qiqihar   | Yuhuan Shi     |
| 207 | Li County Hospital of Traditional Chinese Medicine                | Central China   | Hunan        | Changde   | Songbai Li     |
| 208 | Luan County People's Hospital                                     | Northern China  | Hebei        | Tangshan  | Guo Li         |
| 209 | Yulong Hospital                                                   | Southwest China | Yunnan       | Lijiang   | Zeyuan He      |
| 210 | Huining People's Hospital                                         | Northwest China | Gansu        | Baiyin    | Jiabin Xi      |
| 211 | Yuncheng Hospital                                                 | Eastern China   | Shandong     | Heze      | Jinglan Diao   |
| 212 | Hepu People's Hospital                                            | Southern China  | Guangxi      | Beihai    | Meisheng Lai   |
| 213 | Duzishan Petrochemical Hospital                                   | Northwest China | Xinjiang     | Karamay   | Shuqiu Qu      |
| 214 | Guiding People's Hospital                                         | Southwest China | Guizhou      | Qinan     | Guoduo Chen    |
| 215 | People's Hospital of Rongchang District                           | Southwest China | Chongqing    | Chongqing | Jie Chen       |
| 216 | Ningbo First Hospital                                             | Eastern China   | Zhejiang     | Ningbo    | Huimin Chu     |
| 217 | Ledong Second People's Hospital                                   | Southern China  | Hainan       | Ledong    | Xiufeng Chen   |
| 218 | Guang'an People's Hospital                                        | Southwest China | Sichuan      | Guang'an  | Tian Tuo       |
| 219 | Linfen People's Hospital                                          | Northern China  | Shanxi       | Linfen    | Junping Deng   |
| 220 | People's Hospital of Bozhou District                              | Southwest China | Guizhou      | Zunyi     | Shengyong Chen |
| 221 | Dianjiang People's Hospital                                       | Southwest China | Chongqing    | Chongqing | Yang Yu        |
| 222 | First Affiliated Hospital of Harbin Medical University.           | Northeast China | Heilongjiang | Harbin    | Yue Li         |
| 223 | Yiniang Hospital                                                  | Southwest China | Yunnan       | Kunming   | Liqiong Yang   |
| 224 | Haidong Ping'an District Hospital of Traditional Chinese Medicine | Northwest China | Qinghai      | Haidong   | Guoqin Xin     |

| ID  | Hospitals                                                             | Territories     | Provinces | City      | Investigator   |
|-----|-----------------------------------------------------------------------|-----------------|-----------|-----------|----------------|
| 225 | Ningjin People's Hospital                                             | Eastern China   | Shandong  | Dezhou    | Tao Zhang      |
| 226 | Yutian Hospital                                                       | Northern China  | Hebei     | Tangshan  | Xiaoyun Feng   |
| 227 | Yanting People's Hospital                                             | Southwest China | Sichuan   | Mianyang  | Mingcheng Bai  |
| 228 | The Fourth Affiliated Hospital Zhejiang University School of Medicine | Eastern China   | Zhejiang  | Yiwu      | Shudong Xia    |
| 229 | Zhongda Hospital, Southeast University (Jiangbei)                     | Eastern China   | Jiangsu   | Nanjing   | Jiayi Tong     |
| 230 | Wuxi Xishan People's Hospital                                         | Eastern China   | Jiangsu   | Wuxi      | Xudong Li      |
| 231 | Dongfeng Hospital                                                     | Northeast China | Jilin     | Liaoyuan  | Wei Liu        |
| 232 | Zhijin People's Hospital                                              | Southwest China | Guizhou   | Bijie     | Zhongshan Wang |
| 233 | Huaiyang People's Hospital                                            | Central China   | Henan     | Zhoukou   | Li Wei         |
| 234 | Suizhou Central Hospital                                              | Central China   | Hubei     | Suizhou   | Fengwei Li     |
| 235 | Tonglu First People's Hospital                                        | Eastern China   | Zhejiang  | Hangzhou  | Xiaolan Li     |
| 236 | Xiantao First People's Hospital                                       | Central China   | Hubei     | Xiantao   | Dongmei Zhu    |
| 237 | Honghu People's Hospital                                              | Central China   | Hubei     | Jingzhou  | Hong Liu       |
| 238 | Affiliated Hospital of North Sichuan Medical College                  | Northwest China | Sichuan   | Nanchong  | Zhan Lv        |
| 239 | Guangyuan Central Hospital                                            | Northwest China | Sichuan   | Guangyuan | Bing Fu        |
| 240 | Dazhou Central Hospital                                               | Northwest China | Sichuan   | Dazhou    | Yong Guo       |
| 241 | Nanchong Central Hospital                                             | Northwest China | Sichuan   | Nanchong  | Tao Liu        |

Supplementary Figure 1. The map of regional economic level of China

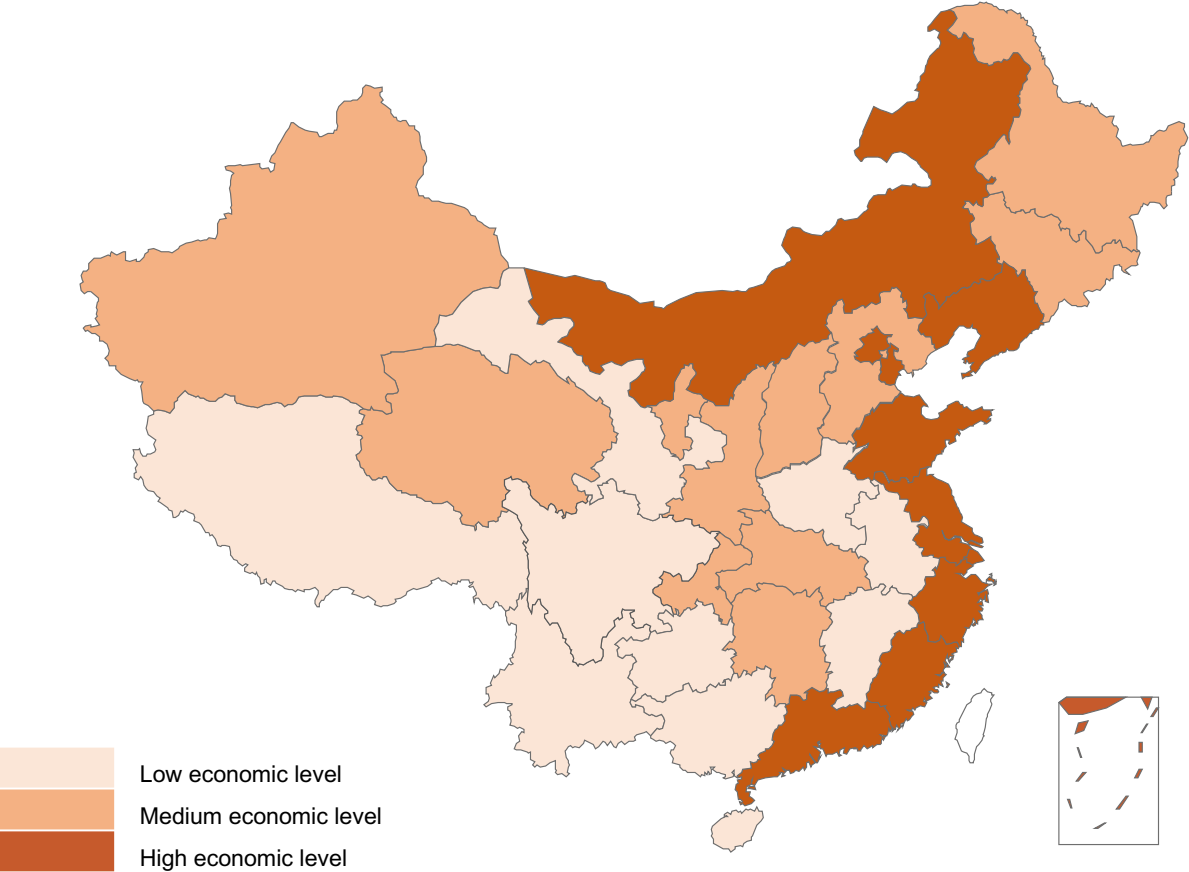

**Supplementary Figure 2. Proportion of patients with STEMI and NSTEMI in hospitals with different inter-hospital transfer rates**

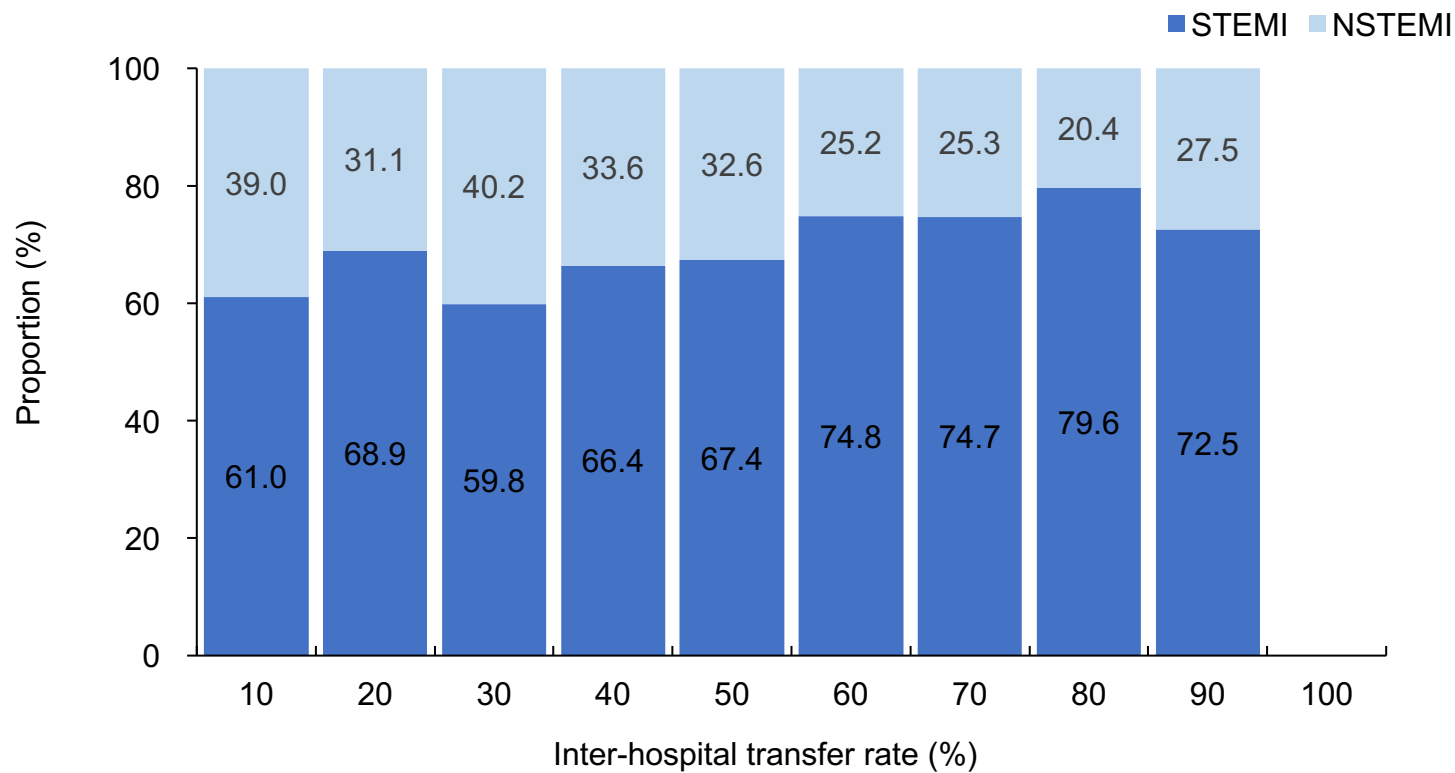

**Abbreviations:** NSTEMI, non-ST-segment elevation myocardial infarction; and STEMI, ST-segment elevation myocardial infarction.
